# Supplementary material for: Visualization of Polymer–Surfactant Interaction by Dual-Emissive Gold Nanocluster Labeling
Source: MDPI journal article supplement (doi:10.3390/bios12090686), 2022-08-26
Supplement: s1 [file s1]

## **Supplementary Material:**

### **Visualization of Polymer-Surfactant Interaction by Dual Emissive Gold Nanoclusters Labeling**

Jiaojiao Zheng<sup>1</sup>, Jing Zhang<sup>1</sup>, Fengniu Lu<sup>2</sup>, Yi Du<sup>3</sup>, Ding Cao<sup>1</sup>, Shui Hu<sup>1</sup>, Yang Yang<sup>3,\*</sup> and Zhiqin Yuan<sup>1,\*</sup>

<sup>1</sup> State Key Laboratory of Chemical Resource Engineering, College of Chemistry, College of Material Science and Engineering, Beijing University of Chemical Technology, Beijing 100029, China

<sup>2</sup> Department of Chemistry and Chemical Engineering Beijing Institute of Technology, Beijing, 100081, China

<sup>3</sup> Analysis Center, Key Laboratory of Bioorganic Phosphorus Chemistry and Chemical Biology (Ministry of Education), Department of Chemistry, Tsinghua University, Beijing 100084, China

<sup>4</sup> State Key Laboratory of NBC Protection for Civilian, Beijing 102205, China

\* Correspondence: ricdyihui@163.com (Y. Yang)

yuanzq@mail.buct.edu.cn (Z. Yuan)

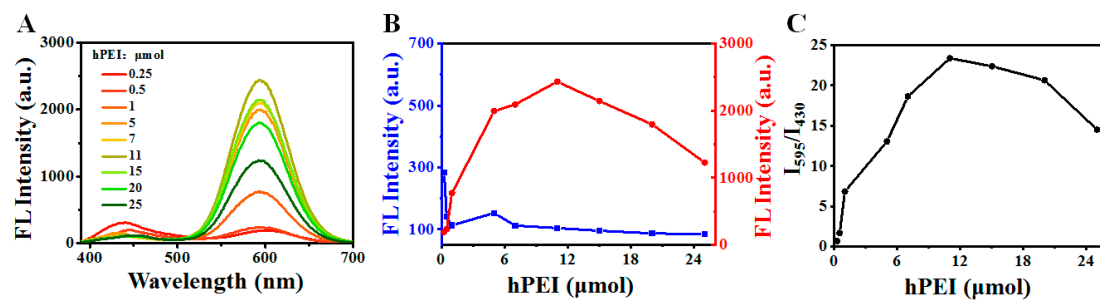

**Figure S1.** (A) Fluorescence emission spectra of DE-Au NCs prepared with various hPEI amounts. (B) Fluorescence intensity of  $I_{595}$  (red line) and  $I_{430}$  (blue line) of DE-Au NCs *versus* the hPEI amount. (C) The intensity ratio ( $I_{595}/I_{430}$ ) of DE-Au NCs *versus* the hPEI amount.

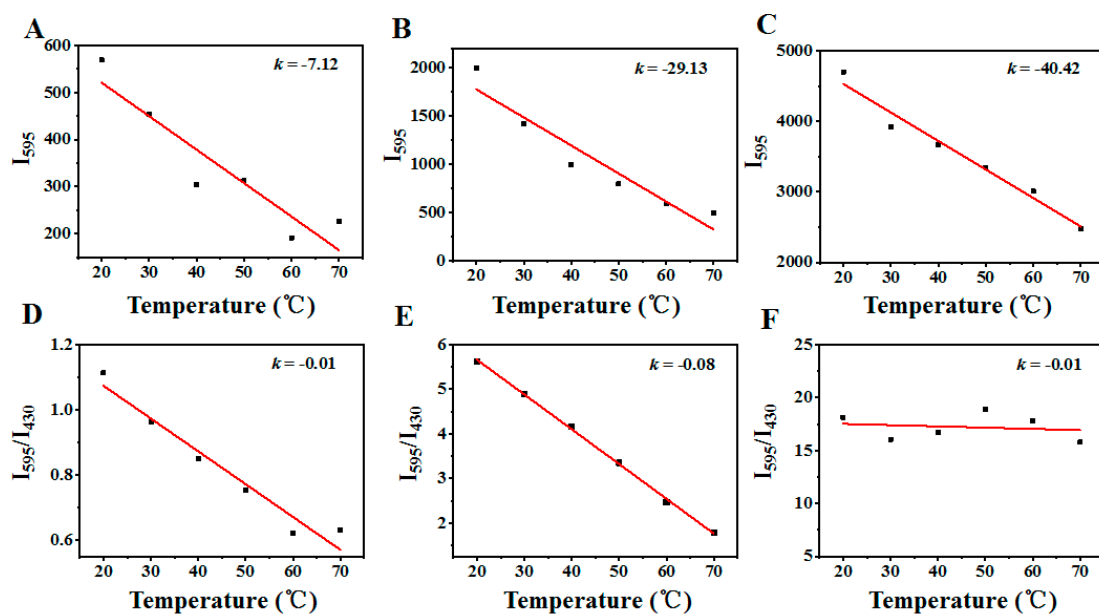

**Figure S2.** (A) The temperature-dependent fluorescence intensity ( $I_{595}$ ) and intensity ratio ( $I_{595}/I_{430}$ ) of DE-Au NCs produced by 0.25  $\mu\text{mol}$  (A and D), 1  $\mu\text{mol}$  (B and E), 11  $\mu\text{mol}$  (C and F) hPEI, respectively.

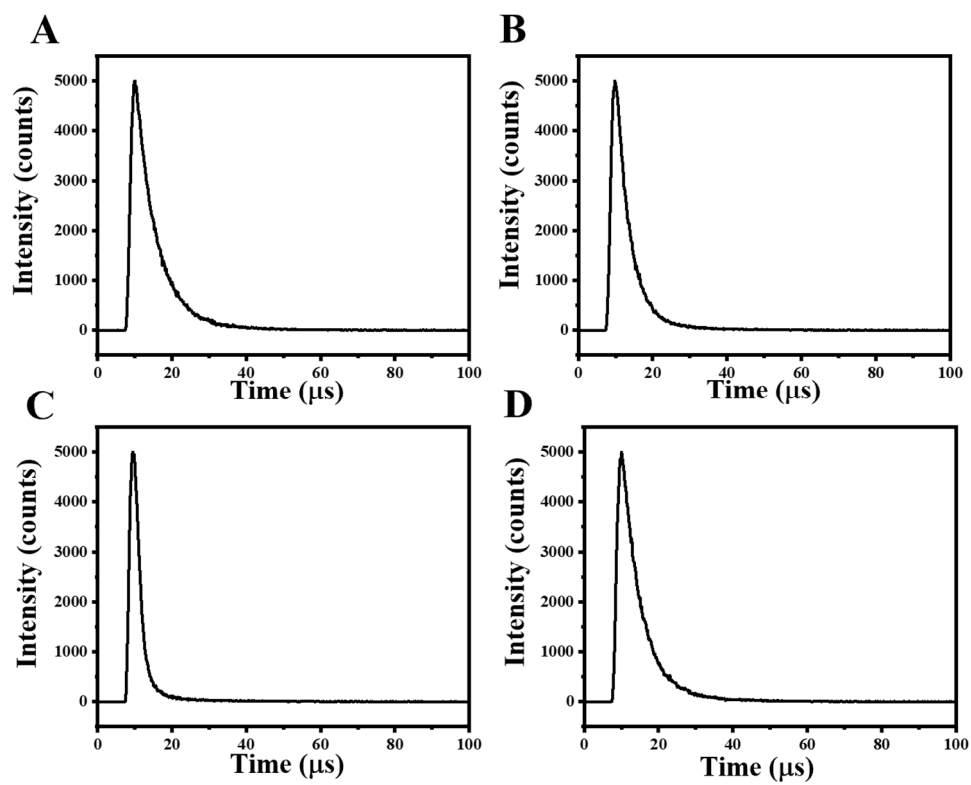

**Figure S3.** Time-resolved fluorescence decay spectra of DE-Au NCs under 20 °C (A), 45 °C (B), 70 °C (C), and return to room temperature (D), respectively.

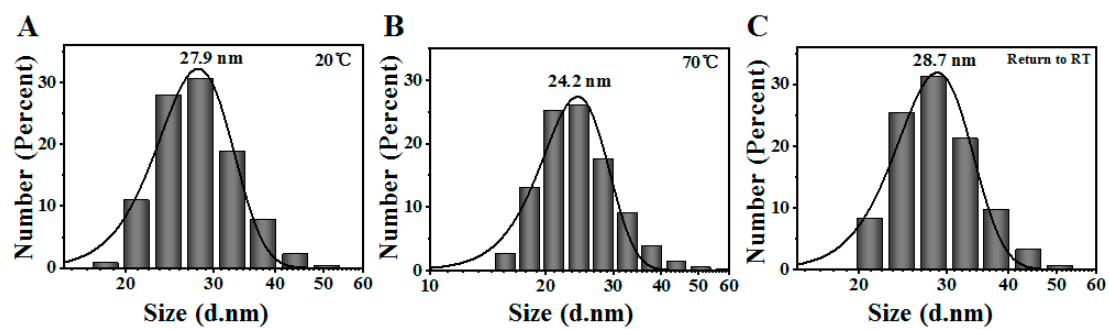

**Figure S4.** Hydrodynamic diameters of DE-Au NCs at 20 °C (A), 70 °C (B) and restored to room temperature (C), respectively.

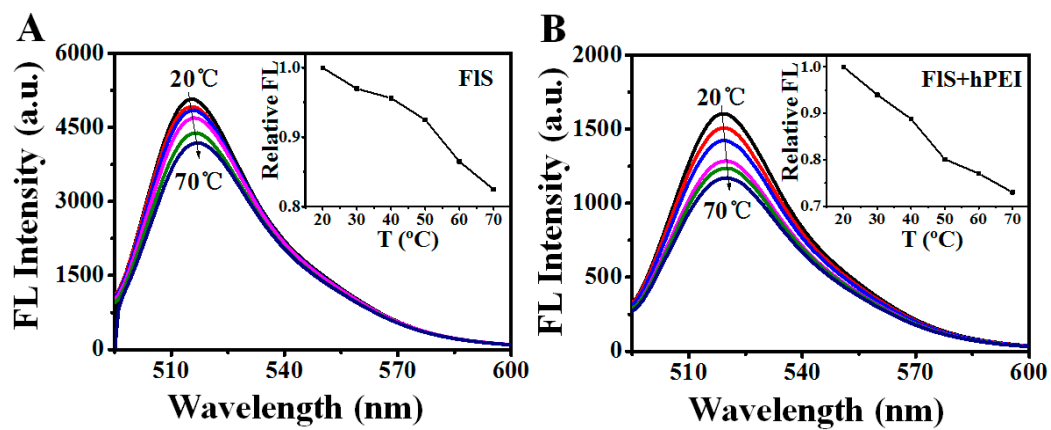

**Figure S5.** Temperature-dependent fluorescence emission spectra of FIS in the absence (A) and presence (B) of hPEI. Inset images are the plots of corresponding relative intensity (490 nm) *versus* the temperature.

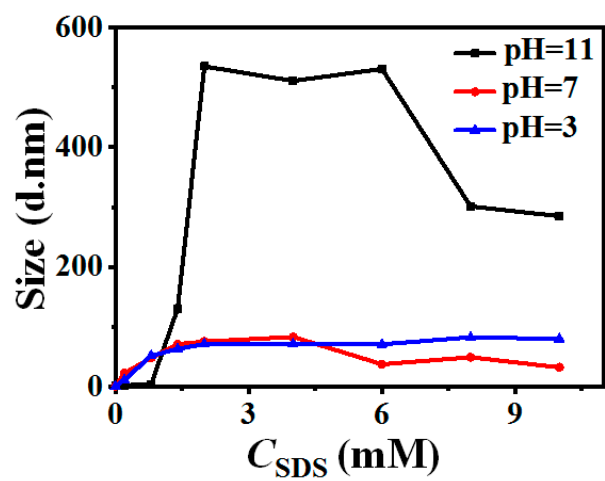

**Figure S6.** Hydrodynamic diameters of hPEI solution after addition of SDS with different concentrations at pH=11 (black line), pH=7 (red line) and pH=3 (blue line), respectively.

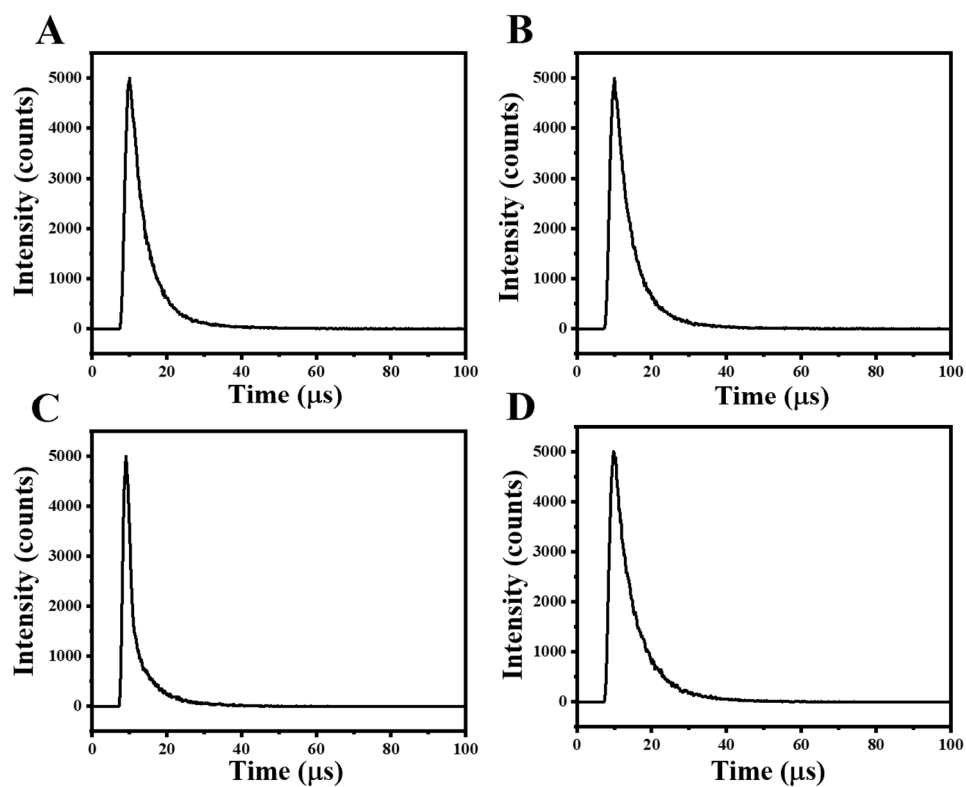

**Figure S7.** Time-resolved fluorescence decay spectra of DE-Au NCs solution with 0 mM SDS (A), 1.6 mM SDS (B), 5 mM SDS (C) and 8 mM SDS (D).



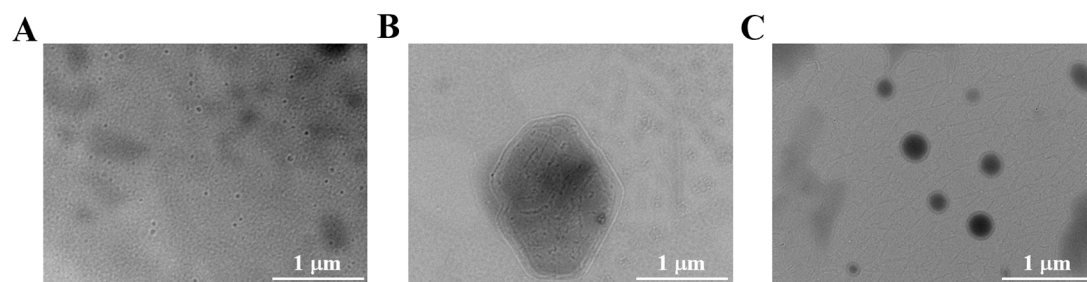

**Figure S8.** TEM images of DE-Au NCs solution with 1.6 mM SDS (A), 5 mM SDS (B) and 8 mM SDS (C).
